# Supplementary material for: Treatment with an antigen-specific dual microparticle system reverses advanced multiple sclerosis in mice
Source: PubMed Central journal article supplement — Proc Natl Acad Sci U S A. 2022 Oct 18;119(43):e2205417119. doi: 10.1073/pnas.2205417119 (PMC9618088; doi:10.1073/pnas.2205417119), 2022-10-18
Supplement: pnas.2205417119.sapp.pdf [file pnas.2205417119.sapp.pdf]

## Supplementary Information for

### Treatment with an Antigen-Specific Dual Microparticle System Reverses Advanced Multiple Sclerosis in Mice

Alexander J Kwiatkowski<sup>1</sup>, Eric Y Helm<sup>2</sup>, Joshua M Stewart<sup>1</sup>, Theodore T Drashansky<sup>2</sup>, Jonathan J Cho<sup>2</sup>, Dorina Avram<sup>2,3\*</sup> and Benjamin G Keselowsky<sup>1,4\*</sup>

<sup>1</sup> J. Crayton Pruitt Family Department of Biomedical Engineering, University of Florida, Gainesville, FL 32611, USA

<sup>2</sup> Department of Anatomy and Cell Biology, College of Medicine, University of Florida, Gainesville, FL 32610, USA

<sup>3</sup> H. Lee Moffitt Cancer Center & Research Institute, Tampa, FL 33612

<sup>4</sup> Department of Pathology, Immunology and Laboratory Medicine, College of Medicine, University of Florida, Gainesville FL 32610, USA.

\*Co-corresponding authors: Benjamin G. Keselowsky; Dorina Avram

**Email:** Bkeselowsky@bme.ufl.edu, Dorina.Avram.moffitt.org

#### **This PDF file includes:**

Extended Methods  
Figures S1 to S7

## **Extended Methods**

### **Microparticle Formulation:**

50:50 PLGA (MW ~ 65,000 g/mol) (Purac) was used for formulation of all MPs. 500 mg of PLGA was dissolved in 2.5 mL methylene chloride for non-phagocytosable MPs or 10 mL for phagocytosable MPs and placed on a shaker for 20 minutes at room temperature. 50 µg VD3 (Cayman Chemical) was dissolved in 1 mL of methanol then added to the PLGA dissolved in methylene chloride. This solution was added to 50 mL of polyvinyl alcohol (PVA) and used a tissue homogenizer at 35,000 rpm for 120 seconds to create the single emulsion. For water soluble MOG and OVA (Mimotopes), factors were dissolved in sterile PBS and added to 10 mL methylene chloride PLGA solution and homogenized at 35,000 rpm for 120 seconds to form the primary emulsion. This solution was added dropwise to 50 mL of 5% PVA and emulsified for 120 seconds at 35,000 rpm to form the secondary emulsion. GM-CSF and TGF-β were dissolved in sterile PBS and placed in a solution of 2.5 mL methylene chloride and PLGA. This solution was then vortexed at 3200 rpm for 120 seconds. 5 mL of 2.5% PVA was added to this solution dropwise and emulsified on a vortex for 120 seconds at 3200 rpm. All MPs were added to 100 mL of 1% PVA and stirred for 5 hours. Following stirring, MPs were centrifuged at 18,000 G for 10 minutes. The MPs were washed 3x in nanopure water and centrifuged at 18,000 G for 10 minutes after each wash. After washing, MPs were flash froze in liquid nitrogen and lyophilized for 48 hours. MPs were checked for endotoxin via chromo-lal and stored at -80 °C until use.

### **Microparticle Characterization:**

Phagocytosable MPs were sized on the Malvern Zetasizer Ultra (Malvern Panalytical), while non-phagocytosable MPs were sized on the LS13320 (Beckman Coulter). Size is reported as mean volume percentage  $\pm$  standard deviation. Encapsulation efficiency of MOG, OVA, TGF- $\beta$ 1 and GM-CSF MPs used CBQCA (ThermoFisher). Briefly MPs were dissolved in 0.1 M sodium borate in an amount such that a 10% encapsulation efficiency would be above the limit of detection for the assay. Following addition of sodium borate the samples were placed in a sonication bath for 20 minutes. CBQCA reagent and potassium cyanide were added to the samples according to manufacturer's protocol. One hour later a plate reader determined the fluorescence. Importantly, the standard curve used the factor of interest rather than the BSA provided in the kit. Quantification of VD3 MPs involved dissolving the PLGA then measuring VD3 via spectrophotometer. To evaluate release kinetics, MPs were placed in a microcentrifuge tube in amount such that 2% factor release could be detected. MPs were suspended in PBS and placed on a shaker at 37 °C. The MPs were spun down at 10,000 G and the supernatant was collected to be used in for evaluation of release. CBQCA was used for MOG, OVA, GM-CSF and TGF- $\beta$  MPs, while spectrometry determined VD3 release. Samples were stored at -20 °C until the release was quantified.

#### **Acquiring a single cell suspension from CNS:**

Following euthanasia, perfusion through the right ventricle with 10 mL of ice-cold PBS cleared circulating cells from the CNS vasculature. A gentleMACS dissociator (Miltenyi Biotec) homogenized the tissue following the brain and spinal cord harvest. Collagenase A (0.33 mg/mL) digestion for 25 minutes shaking at 37

°C followed by mechanical dissociation through a 70 µm filter removed excess CNS tissue. Following centrifugation at 380 G for five minutes, a 30% isotonic Percoll (GE Healthcare), underlaid with 70% isotonic Percoll and spun at 650 G for 25 minutes with no brake separated red blood cells, immune cells and myelin. The interphase between the 30-70% layers contained mononuclear cells, and these were stained for flow cytometry or prepared for single-cell RNA sequencing.

### **Histological Analysis**

Using the Leica protocol, samples were dehydrated with ethanol starting with 90% and two rinses of 100% for 15 minutes each. Cleaning then used three xylene washes for 20, 20, and 45 minutes, respectively. Samples were exposed to paraffin wax for three changes of 30, 30, and 45 minutes, respectively. The spinal cord was embedded (Tissue-Tek) so that the L1 vertebrae was the first cross-section cut and ended at L6. The blocks were sectioned at 4 µm and dried overnight before staining. All staining sections were deparaffinized by the following: two five minute changes of xylenes, two three minute changes of 100% ethanol, one minute change of 95% ethanol, and a rinse in deionized water. H&E staining utilized a kit from Vector labs. Briefly, the protocol was 5 minutes in hematoxylin, two rinses of deionized water, bluing reagent for 15 seconds, rinsed in 100% ethanol, 3 minutes in Eosin Y, and three two minute rinses in 100% ethanol then coverslipped. For luxol fast blue staining, after deparaffinization, 0.1% LFB was added to the slides for two hours at 60 °C followed by a three minute change in 70% ethanol and a change in each deionized water, lithium carbonate, and distilled water. Counterstain used cresyl violet for 10 minutes followed by rinses in 95% ethanol and xylenes twice; then the slides were

coverslipped. Imaging at 5x and 20x magnification took place on a Zeiss Axio Inverted Microscope (Carl Zeiss).

### **Multiplex Immunofluorescence**

Formalin-fixed and paraffin-embedded (FFPE) tissue samples were immunostained using the AKOYA Biosciences OPAL™ 7-Color Automation IHC kit on the BOND RX autostainer (Leica Biosystems). The OPAL 7-color kit uses tyramide signal amplification (TSA)-conjugated to individual fluorophores to detect various targets within the fluorescent multiplex assay.

Sections were baked at 65 °C for three hours then transferred to the BOND RX (Leica Biosystems). All subsequent steps (ex., deparaffinization, antigen retrieval) were performed using an automated OPAL IHC procedure (AKOYA). OPAL staining of each antigen occurred as follows: heat induced epitope retrieval (HIER) was achieved with EDTA pH 9.0 buffer for 20 minutes at 95°C before the slides were blocked with AKOYA blocking buffer for 10 minutes. Then slides were incubated with primary antibody and one of the OPAL fluorophores during the final TSA step. Staining used the following antibodies, TMEM119 (Abcam, 28-3, HIER- EDTA pH 9.0, 1:100, dye 570), Ki67 (Abcam, SP6, HIER- Citrate pH 6.0, 1:300, dye 620), CD74 (LS Bio, Rb poly, HIER- EDTA pH 9.0, 1:600, dye 520), GFAP (Abcam, EPR1034Y, HIER- EDTA pH 9.0, 1:500, dye 540), CD4 (CST, D7D2Z, HIER- EDTA pH 9.0, 1:100, dye 650), and CD8 (CST, D4W2Z, HIER- EDTA pH 9.0, 1:100, dye 690). All slides were imaged with the Vectra®3 Automated Quantitative Pathology Imaging System. Individual antibody complexes were stripped after each round of antigen detection. After

the final stripping step, DAPI counterstain is applied to the multiplexed slide and is removed from BOND RX for coverslipping with ProLong Diamond Antifade Mountant (ThermoFisher Scientific).

## **Antibodies**

Cells were stained with the following antibodies: CD11b (BV510, clone: M1/70), CD11c (BV711, clone: N418), F4/80 ( PE, PE-Cy7, clone: BM8), MHCII (BV421, APC-ef780, clone: M5/114.15.2), TCR- $\beta$  (ef450, clone: H57-597), Ly6c (Pacific Blue, clone:HK1.4), Ly6g (PE-Dazzle594, clone: 1A8), CD8 $\alpha$  ( BV605, SB600, clone: 53-6.7), CD86 (PE-Cy5, APC, clone: GL1), CD4 (BV785, SB780, clone: RM4-5), GR-1 (PE\_Cy7, clone: RB6-8C5), CD19 (APC, clone: 1D3), CD45.2 (AF700, clone:104), B220 (BV650, clone: RA3-6B2). Tmem119 (af488, clone: V3RT1GOsz, 28-3), CD74 (AF647, clone: In1/CD74), CD3 $\epsilon$  (BV650, clone: 145-2C11), Ki-67 (PE-Dazzle594, clone: 16a8), Foxp3 (PE-cf594, clone: MF23), Ror $\gamma$ t (APC, clone: AFKJS-9), tbet (BV421, clone: 4B10), IL-23R (BV421, clone: 12B2B64), CD16/32 (FC $\gamma$  III/II receptor, clone 2.4G2), and Fixable viability dye (ef780, Zombie NIR)

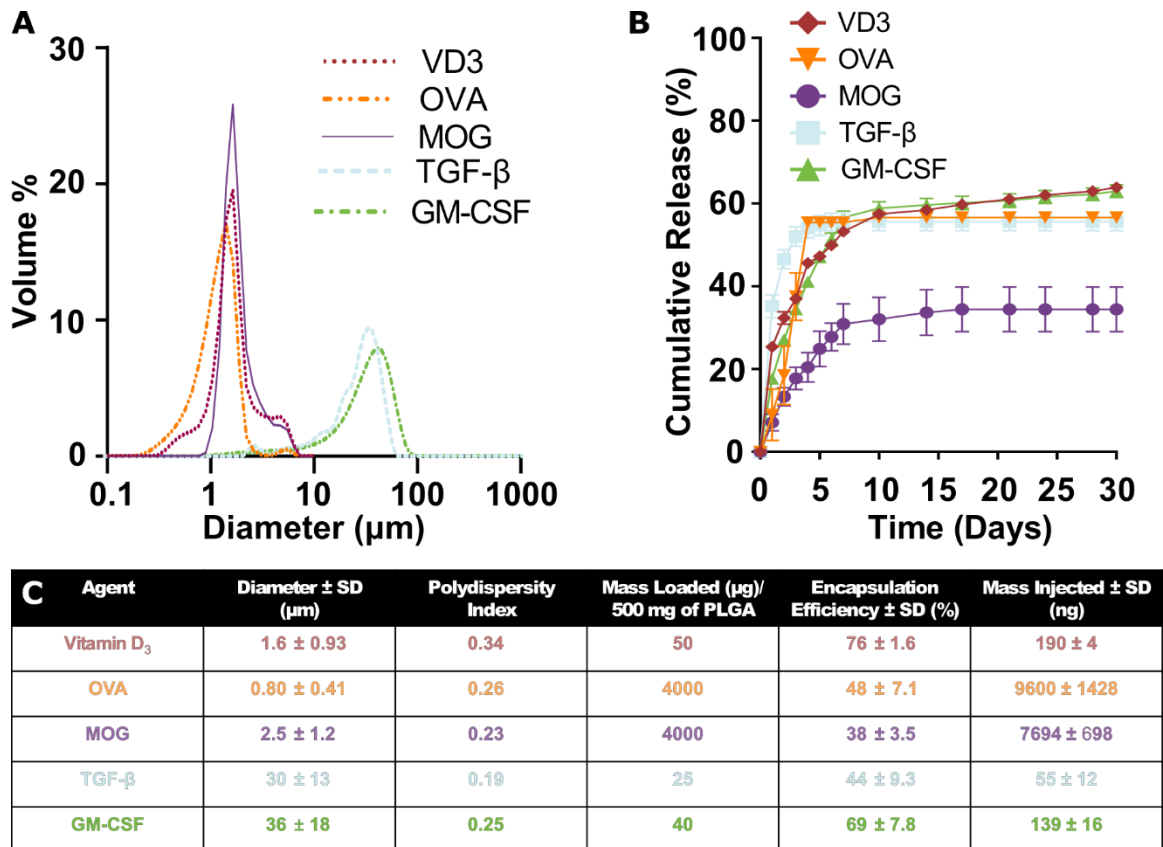

**Figure S1. dMP characterization** a) Size quantification of MPs by dynamic light scattering. b) Release kinetics of each agent encapsulated measured over 30 days. c) Sizing, polydispersity index, loading amount, encapsulation efficiency, and dose per injection for MPs containing each agent. Polydispersity index was calculated as standard deviation divided by mean diameter quantity squared.

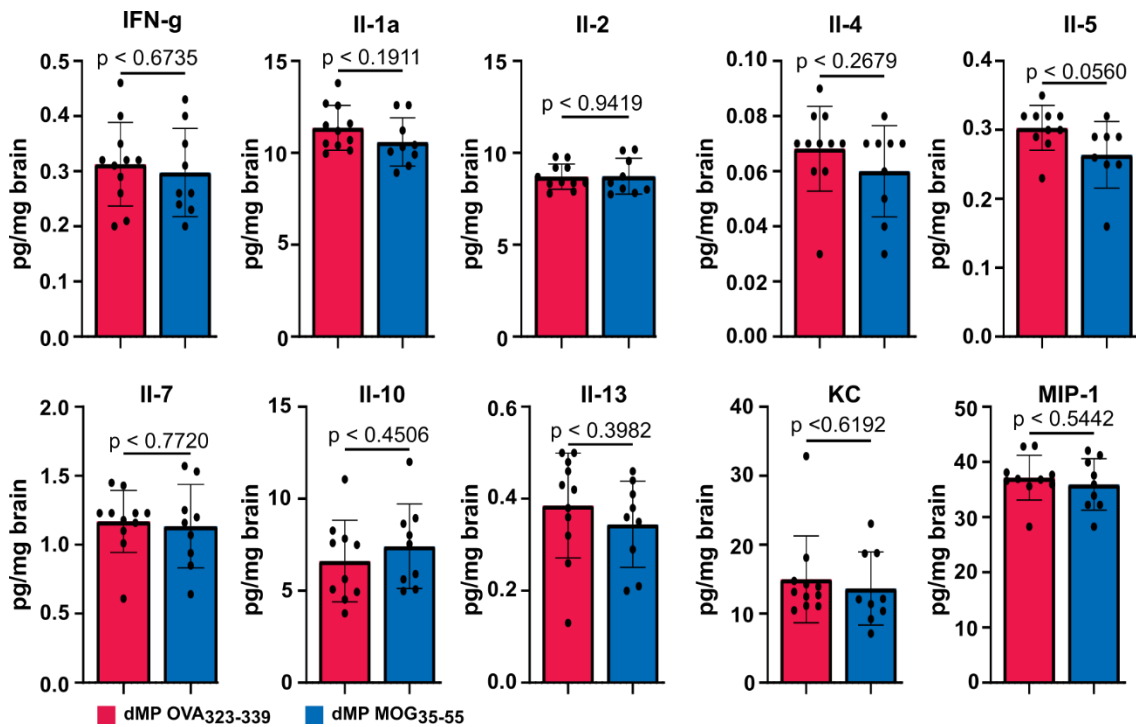

**Fig. S2. Cytokines less correlated with MS were not differently produced in the CNS between dMIP MOG vs. dMIP OVA treatment.** Luminex xMAP technology multiplexed quantification of Mouse cytokines, chemokines, and growth factors from complete brain homogenate at a concentration of 4 mg/mL on day 7 post treatment. n=8-11 \* represents  $p < 0.05$ , \*\* represents  $p < 0.01$



A

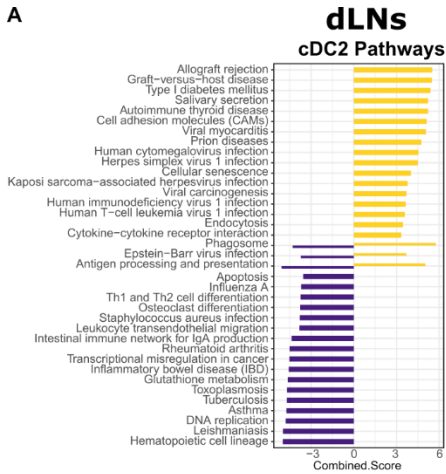

B

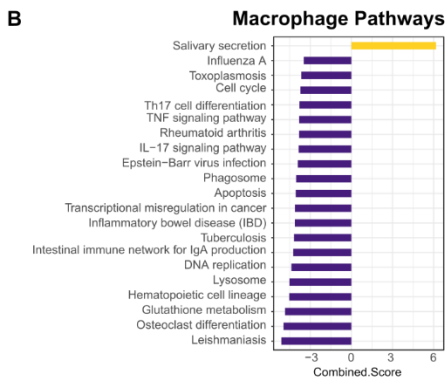

C

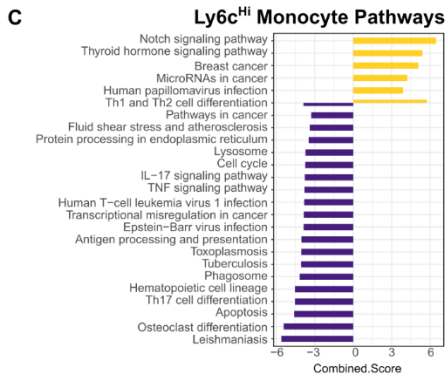

D

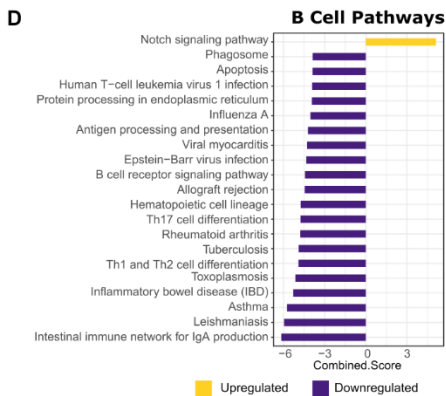

E

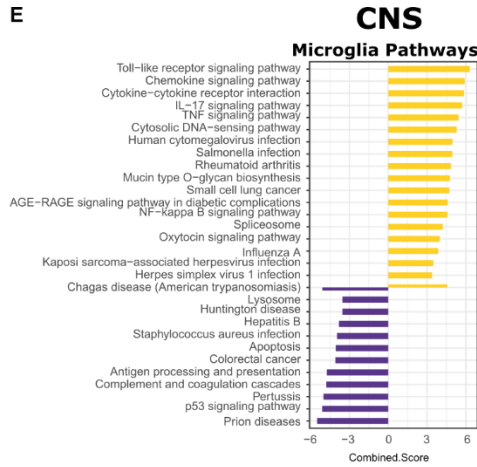

F

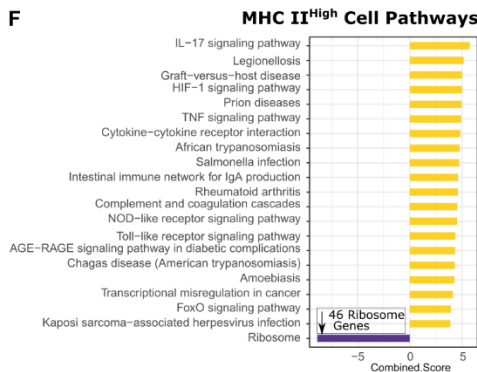

G

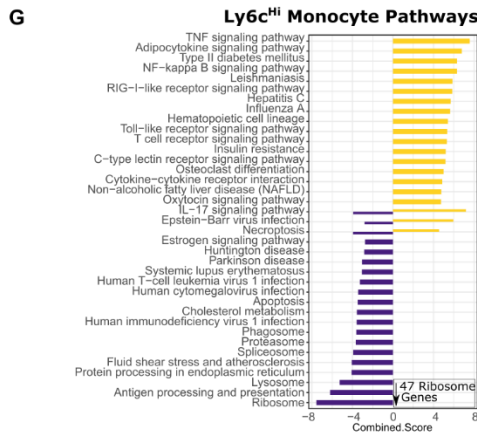

H

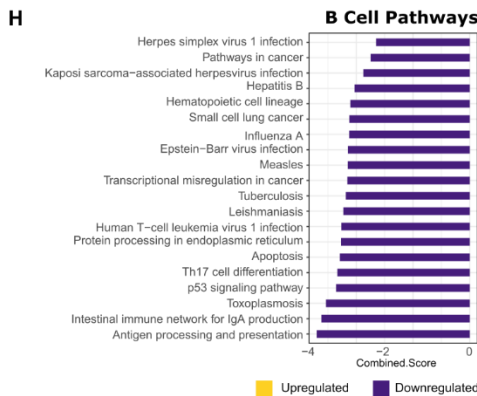

**Fig. S3. APCs downregulated Antigen presentation, activation and Pro-inflammatory pathway genes in both the dLNs and CNS.** Pathways modulated in a) cDC2s, b) macrophages, c) Ly6c<sup>Hi</sup> monocytes and d) B cells located in the dLNs at day 2, specifically antigen presentation. Pathways modulated in e) microglia, f) MHC II<sup>High</sup> cells, g) Ly6c<sup>Hi</sup> monocytes and h) B cells in the spinal cord at day 7, specifically antigen presentation and ribosome. Genes with  $p_{\text{adjusted}} < 0.1$  were used in pathway analysis. Significant genes were compared to the KEGG pathways and  $p_{\text{adjusted}} < 0.1$  denoted a pathway was up or downregulated. n=2 mice per group in the dLNs and n=1 mouse per group in the CNS

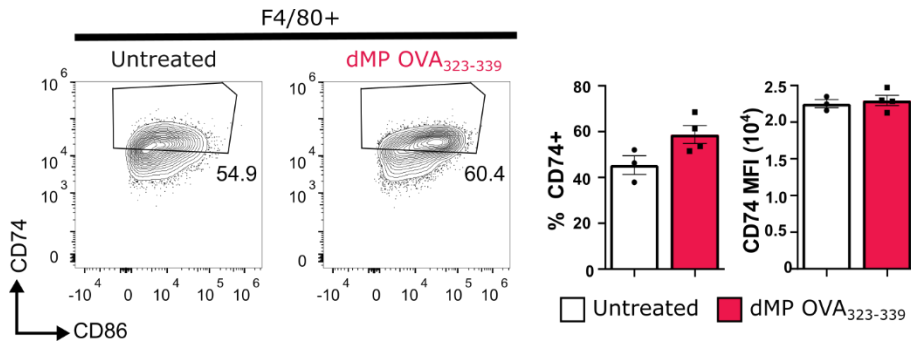

**Figure S4. dMP OVA treatment in mice with advanced EAE does not result in reduction in MHCII components in macrophages.** Representative flow plots and quantification of CD74 in the spinal cord on day 7 in macrophages.

**A**

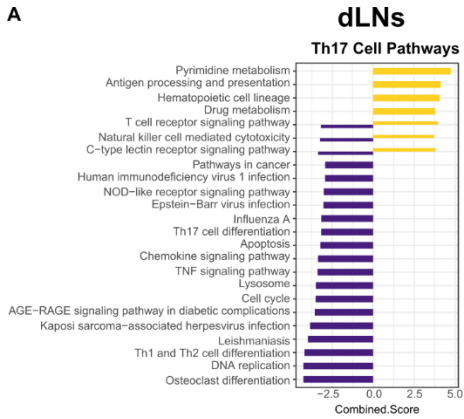

**B**

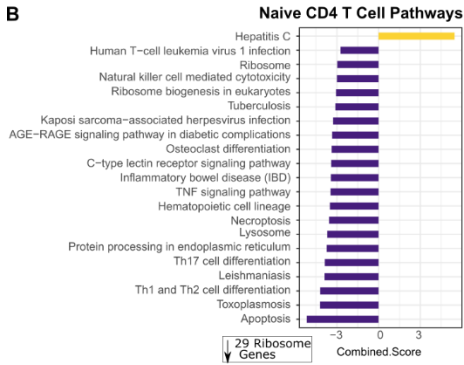

**C**

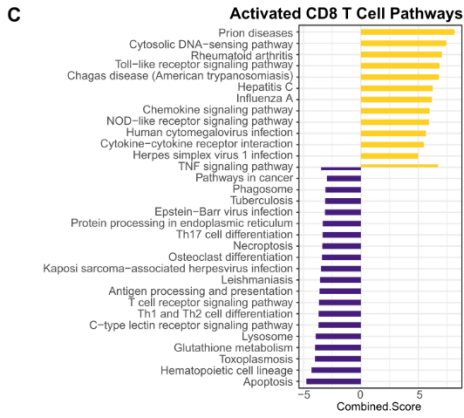

**D**

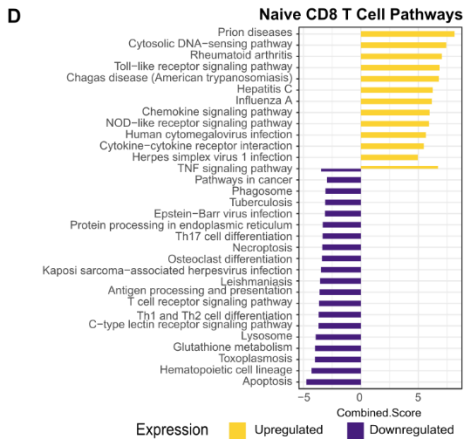

**E**

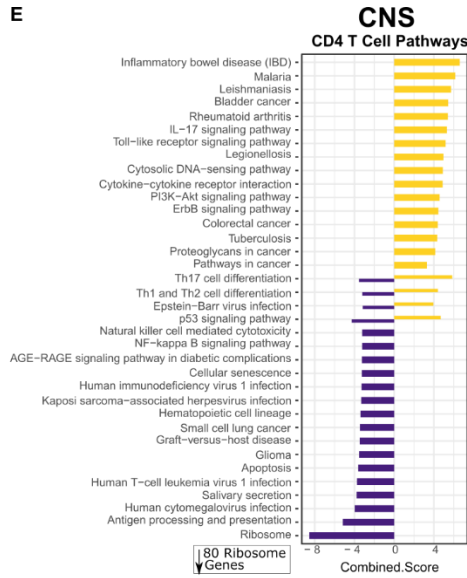

**F**

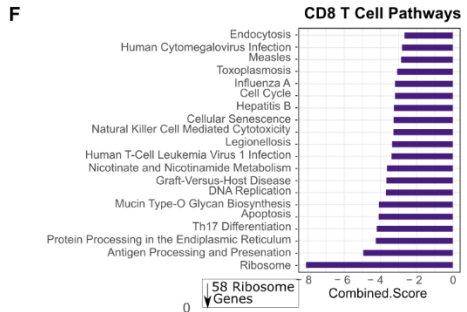

**G**

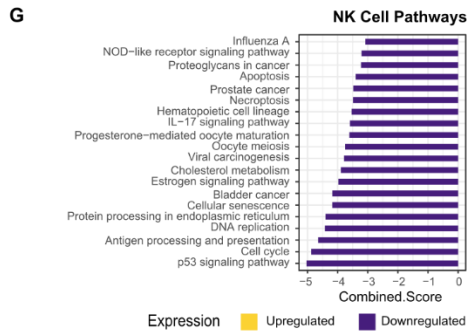

**Fig. S5. T Cells downregulated Pro-inflammatory and activation pathways in both the dLNs and CNS.** Pathways modulated in a) Th17 Cells, b) naïve CD4+ T cells, c) Activated CD8+ T cells and d) naïve CD8+ T cells located in the dLNs at day 2, including ribosome and DNA replication. Pathways modulated in e) CD4+ T cells, f) CD8+ T cells and g) NK cells in the spinal cord at day 7. Genes with padjusted  $<0.1$  were used in pathway analysis. Significant genes were compared to the KEGG pathways and padjusted  $<0.1$  denoted a pathway was up or downregulated.  $n=2$  mice per group in the dLNs and  $n=1$  mouse per group in the CNS.

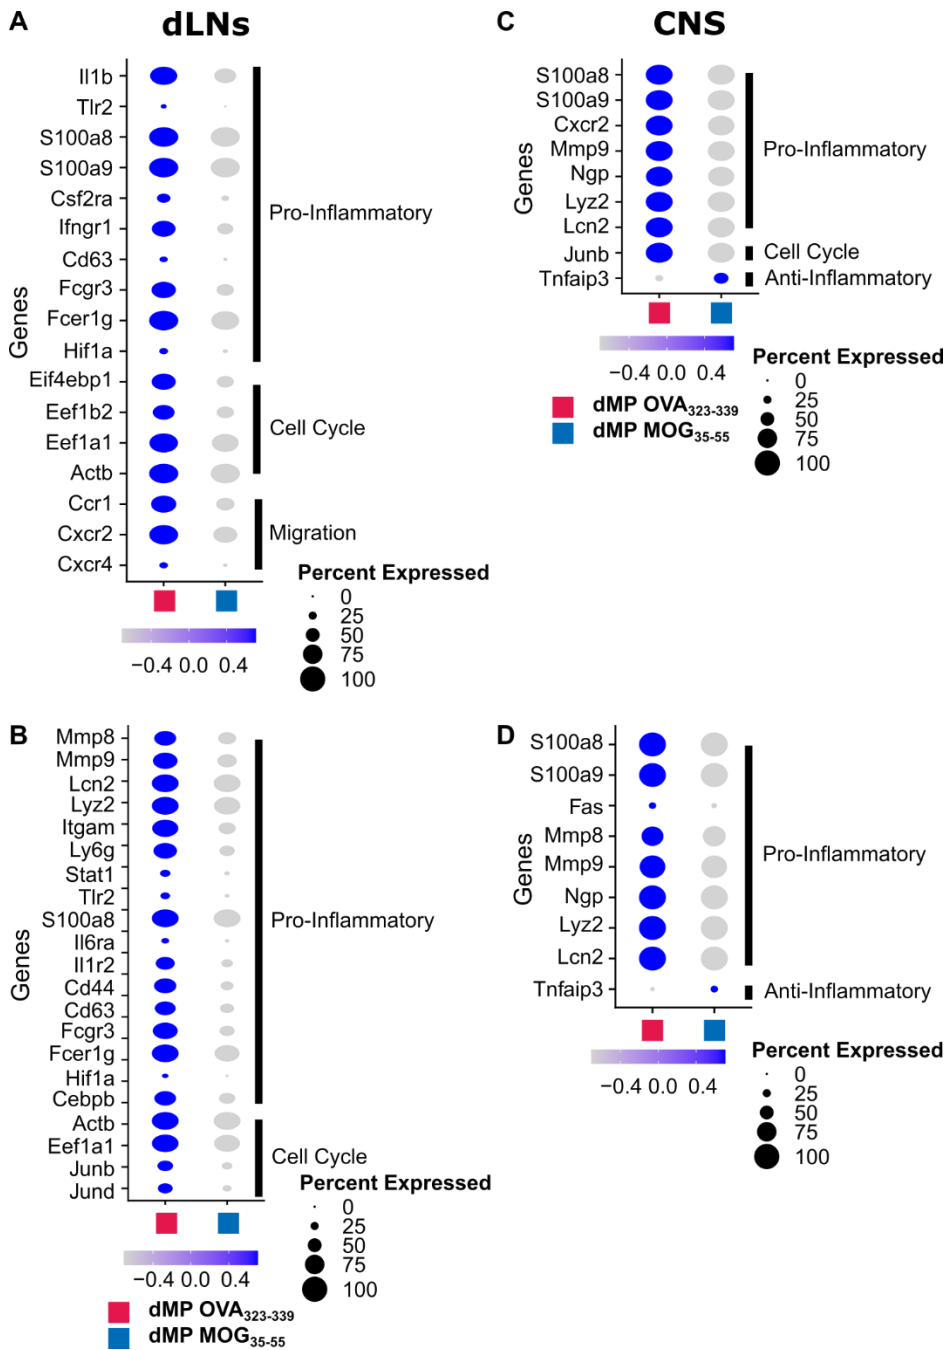

**Fig. S6. Neutrophils downregulate pro-inflammatory and cell cycle genes in the dLNs and CNS.** Dot plots highlighting pro-inflammatory, cell cycle, and migration genes differentially expressed in a) inflammatory neutrophils and b) suppressive neutrophils, specifically genes associated with pro-inflammatory processes in the dLNs at day 2. Dot

plots showing downregulation of pro-inflammatory and upregulation of anti-inflammatory genes in the c) inflammatory and d) suppressive neutrophils located in the CNS at day 7. Genes with a  $p_{\text{adjusted}} < 0.1$  of were considered significant.  $n=2$  mice per group in the dLNs and  $n=1$  mouse per group in the CNS.

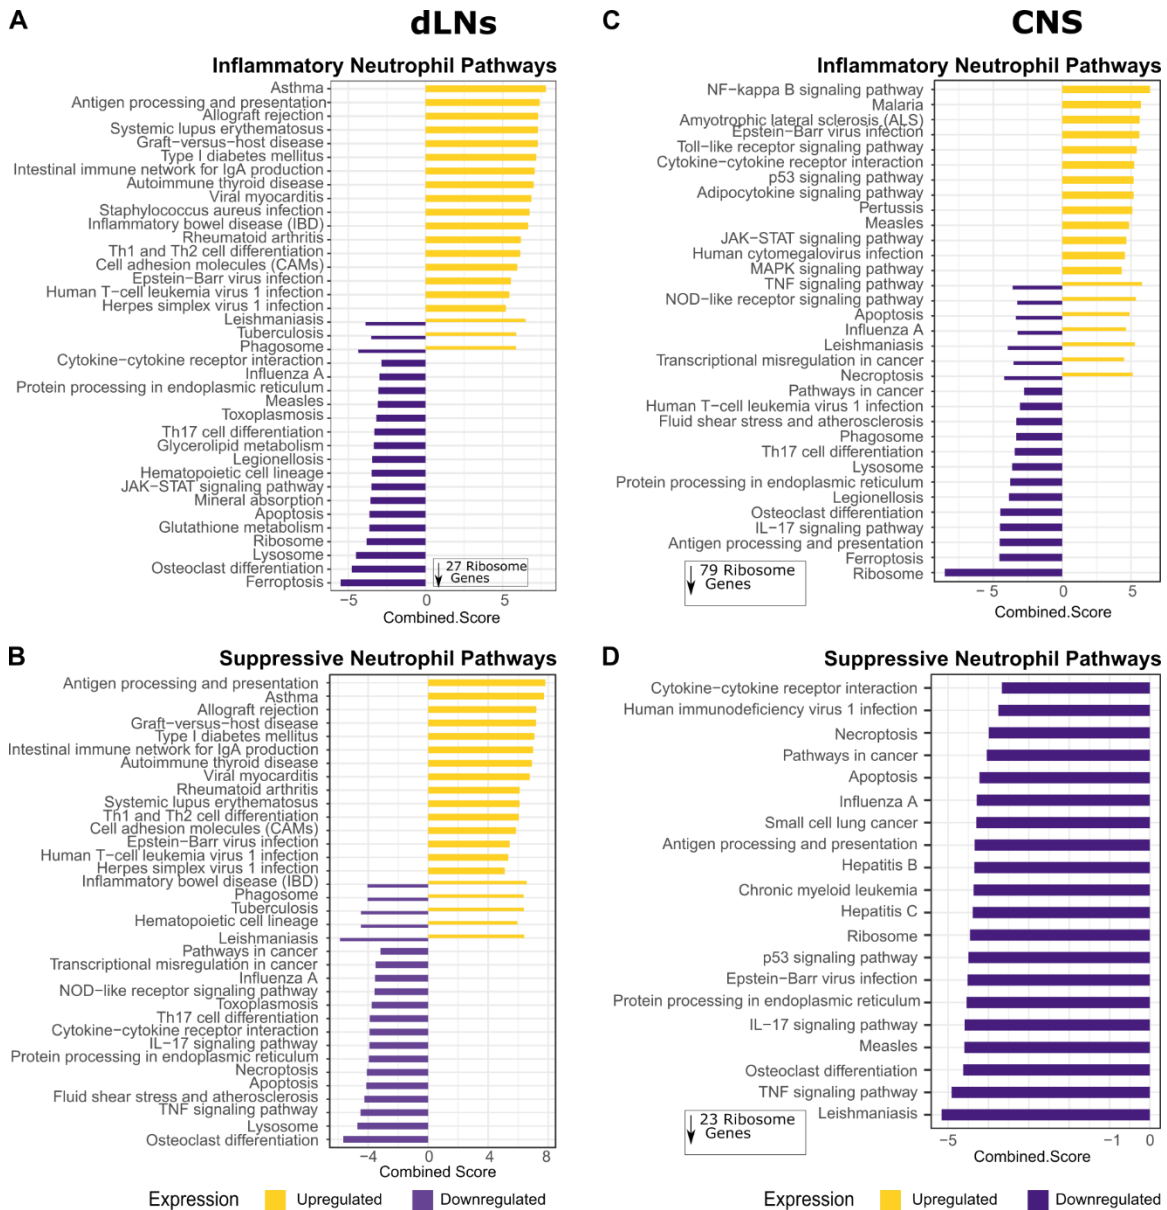

**Fig. S7. Neutrophils downregulated Pro-inflammatory pathways in both the dLNs and CNS.** Pathways modulated in a) inflammatory neutrophils and b) Suppressive neutrophils located in the dLNs at day 2, including ribosome and phagocytosis. Pathways modulated in c) inflammatory neutrophils and d) Suppressive neutrophils located in the CNS at day 7, including ribosome. Genes with  $p_{\text{adjusted}} < 0.1$  were used in pathway analysis. Significant genes were compared to the KEGG pathways and  $p_{\text{adjusted}}$



<0.1 denoted a pathway was up or downregulated. n=2 mice per group in the dLNs and n=1 mouse per group in the CNS.
